# Supplementary material for: Loss of atrx cooperates with p53-deficiency to promote the development of sarcomas and other malignancies
Source: PLoS Genet. 2019 Apr 10;15(4):e1008039. doi: 10.1371/journal.pgen.1008039 (PMC6476535; doi:10.1371/journal.pgen.1008039)
Supplement: S5 Table — (XLSX) [file pgen.1008039.s010.xlsx]

## Sheet: Tabelle1
S5 Table: Quantification of relative telomere signal in FISH images derived from atrx+/+ and atrx+/- tumors in p53/nf1 deficient background
Data corresponds to Figure 7C and D.
Sample	Count	Total area	Average size	% Area	DNA area %	Relative DNA content factor	Normalized Count	Normalized Area %
p53-/-; nf1b-/-; nf1a+/-; atrx+/+; tumor 1	12	0.054	0.005	0.081	61.07	1.63747	19.6496	0.132635
p53-/-; nf1b-/-; nf1a+/-; atrx+/+; tumor 2	4	0.022	0.006	0.033	54.306	1.84142	7.36567	0.0607668
p53-/-; nf1b-/-; nf1a+/-; atrx+/+; tumor 3	9	0.035	0.004	0.052	40.251	2.48441	22.3597	0.129189
p53-/-; nf1b-/-; nf1a+/-; atrx+/+; tumor 4	15	0.054	0.004	0.08	70.595	1.41653	21.248	0.113322
p53-/-; nf1b-/-; nf1a+/-; atrx+/+; tumor 5	8	0.047	0.006	0.071	96.261	1.03884	8.31074	0.0737578
p53-/-; nf1b-/-; nf1a+/-; atrx+/+; tumor 6	7	0.031	0.004	0.047	82.549	1.2114	8.47981	0.0569359
p53-/-; nf1b-/-; nf1a+/-; atrx+/-; tumor 1	8	0.21	0.026	0.314	91.796	1.08937	8.71498	0.342063
p53-/-; nf1b-/-; nf1a+/-; atrx+/-; tumor 2	19	0.148	0.008	0.221	47.967	2.08477	39.6106	0.460733
p53-/-; nf1b-/-; nf1a+/-; atrx+/-; tumor 3	15	0.079	0.005	0.118	87.235	1.14633	17.1949	0.135267
p53-/-; nf1b-/-; nf1a+/-; atrx+/-; tumor 4	32	0.237	0.007	0.354	98.97	1.01041	32.333	0.357684
p53-/-; nf1b-/-; nf1a+/-; atrx+/-; tumor 5	29	0.179	0.006	0.267	70.174	1.42503	41.3258	0.380483
p53-/-; nf1b-/-; nf1a+/-; atrx+/-; tumor 6	36	0.411	0.011	0.614	61.435	1.62774	58.5985	0.99943
Mean atrx+/+	9.16667	0.0405	0.00483333	0.0606667	67.5053	1.60501	14.5689	0.0944345
Standard deviation atrx+/+	3.86868	0.0131871	0.000983192	0.0196027	20.1056	0.517935	7.20066	0.0346153
Mean atrx+/-	23.1667	0.210667	0.0105	0.314667	76.2628	1.39727	32.963	0.445943
Standard deviation atrx+/-	10.8704	0.112333	0.00786766	0.167852	19.6717	0.408405	17.9349	0.291874
Ttest (p-value)							0.0419556	0.0150554
							Figure 7C	Figure 7D
